# Supplementary material for: The preoperative triglyceride-glucose index has a positive effect on predicting the risk of short-term restenosis after carotid artery stenting: a retrospective cohort study
Source: PubMed Central journal article supplement (PMC10149666; doi:10.3389/fneur.2023.1159601), 2023-04-17

## Cox Regression Power Analysis

### Numeric Results

| Power   | Sample<br>Size<br>(N) | Reg.<br>Coef.<br>(B) | S.D.<br>of X1<br>(SD) | Event<br>Rate<br>(P) | R-Squared                  | Two-<br>Sided<br>Alpha | Beta    |
|---------|-----------------------|----------------------|-----------------------|----------------------|----------------------------|------------------------|---------|
|         |                       |                      |                       |                      | X1 vs<br>Other X's<br>(R2) |                        |         |
| 0.16408 | 20                    | 1.1560               | 0.5690                | 0.1420               | 0.2150                     | 0.05000                | 0.83592 |
| 0.45122 | 70                    | 1.1560               | 0.5690                | 0.1420               | 0.2150                     | 0.05000                | 0.54878 |
| 0.67210 | 120                   | 1.1560               | 0.5690                | 0.1420               | 0.2150                     | 0.05000                | 0.32790 |
| 0.81684 | 170                   | 1.1560               | 0.5690                | 0.1420               | 0.2150                     | 0.05000                | 0.18316 |
| 0.90275 | 220                   | 1.1560               | 0.5690                | 0.1420               | 0.2150                     | 0.05000                | 0.09725 |
| 0.95038 | 270                   | 1.1560               | 0.5690                | 0.1420               | 0.2150                     | 0.05000                | 0.04962 |

### References

- Hsieh, F.Y. and Lavori, P.W. 2000. 'Sample-Size Calculations for the Cox Proportional Hazards Regression Model with Nonbinary Covariates', *Controlled Clinical Trials*, Volume 21, pages 552-560.
- Schoenfeld, David A. 1983. 'Sample-Size Formula for the Proportional-Hazards Regression Model', *Biometrics*, Volume 39, pages 499-503.

### Report Definitions

- Power is the probability of rejecting a false null hypothesis. It should be close to one.
- N is the size of the sample drawn from the population.
- B is the size of the regression coefficient to be detected
- SD is the standard deviation of X1.
- P is the event rate.
- R2 is the R-squared achieved when X1 is regressed on the other covariates.
- Alpha is the probability of rejecting a true null hypothesis.
- Beta is the probability of accepting a false null hypothesis.

### Summary Statements

A Cox regression of the log hazard ratio on a covariate with a standard deviation of 0.5690 based on a sample of 20 observations achieves 16% power at a 0.05000 significance level to detect a regression coefficient equal to 1.1560. The sample size was adjusted since a multiple regression of the variable of interest on the other covariates in the Cox regression is expected to have an R-Squared of 0.2150. The sample size was adjusted for an anticipated event rate of 0.1420.

### Cox Regression Power Analysis

#### Chart Section

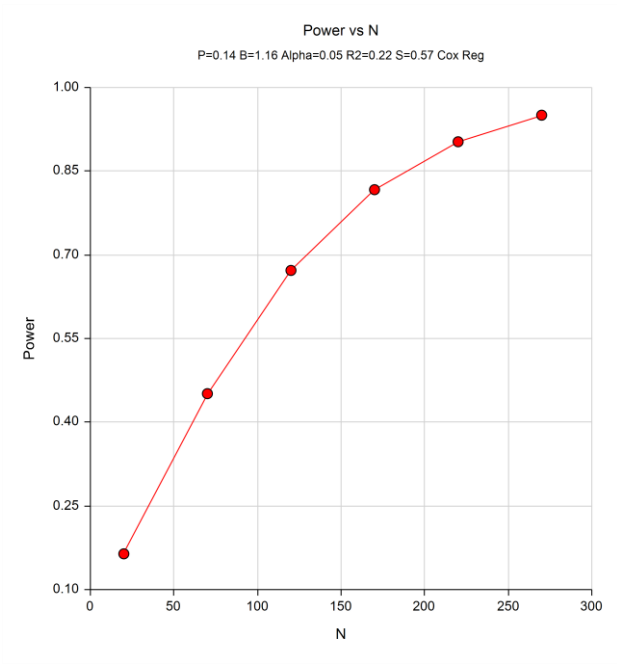

Supplement: Data_Sheet_1.pdf [file Data_Sheet_1.pdf]
