# Supplementary material for: The preoperative triglyceride-glucose index has a positive effect on predicting the risk of short-term restenosis after carotid artery stenting: a retrospective cohort study
Source: PubMed Central journal article supplement (PMC10149666; doi:10.3389/fneur.2023.1159601), 2023-04-17
Supplement: Table_1.pdf [file Table_1.pdf]

Table S1. Tests of Schoenfeld's residuals

| Model                                                   | Variables             | $\chi^2$ | <i>P</i> |
|---------------------------------------------------------|-----------------------|----------|----------|
| Univariate                                              | TyG                   | 4.674    | 0.031    |
|                                                         | GLOBAL                | 4.674    | 0.031    |
| Univariate<br>+ Time interaction term                   | TyG                   | 1.207    | 0.272    |
|                                                         | Time interaction term | 0.002    | 0.964    |
|                                                         | GLOBAL                | 1.724    | 0.422    |
| Backward stepwise regression<br>+ Time interaction term | TyG                   | 1.17     | 0.279    |
|                                                         | Minimum diameter      | 0.712    | 0.399    |
|                                                         | Time interaction term | 0.011    | 0.917    |
|                                                         | GLOBAL                | 2.877    | 0.411    |
| Multivariate Adjustment<br>+ Time interaction term      | TyG                   | 1.76     | 0.185    |
|                                                         | age                   | 0.03     | 0.862    |
|                                                         | gender                | 3.247    | 0.072    |
|                                                         | Symptomatic           | 0.13     | 0.718    |
|                                                         | Hypertension          | 1.599    | 0.206    |
|                                                         | Dyslipidemia          | 0.176    | 0.675    |
|                                                         | diabetes mellitus     | 1.475    | 0.225    |
|                                                         | Current smoking       | 1.503    | 0.22     |
|                                                         | Minimum diameter      | 0.776    | 0.378    |
|                                                         | Length                | 0.442    | 0.506    |
|                                                         | Time interaction term | 0.051    | 0.821    |
| GLOBAL                                                  | 12.076                | 0.358    |          |

TyG: Triglyceride-glucose
